# Supplementary material for: Visualizing transfer of microbial biomolecules by outer membrane vesicles in microbe‐host‐communication in vivo
Source: PubMed Central journal article supplement (PMC8524437; doi:10.1002/jev2.12159), 2021-10-19

**a**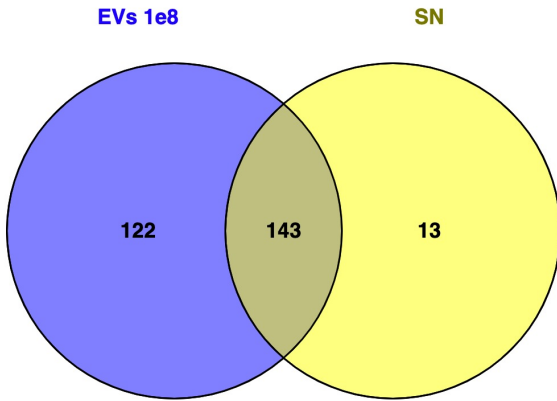**b**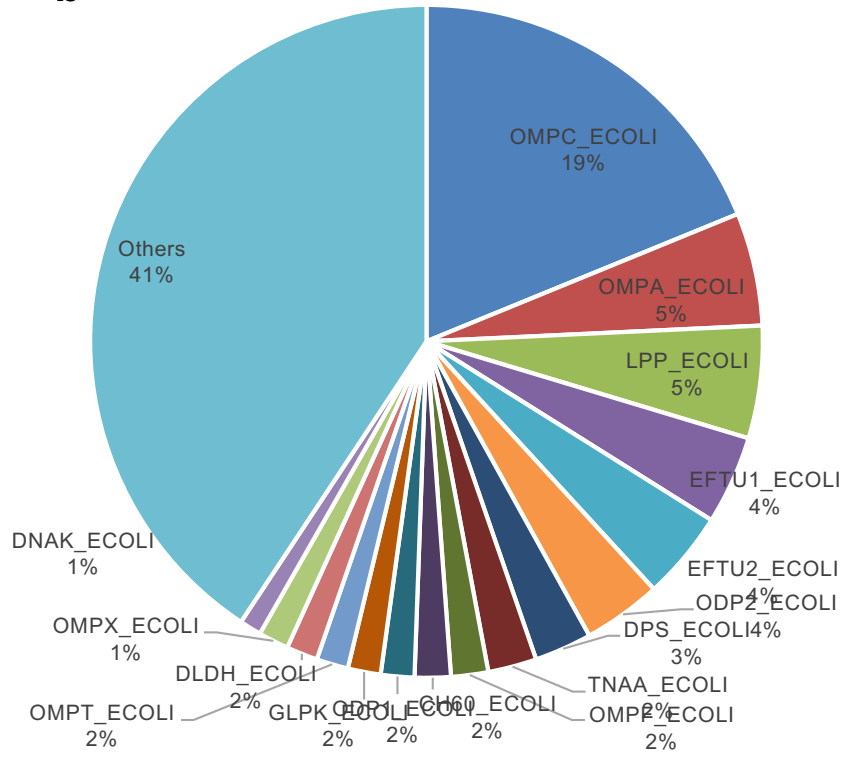**c**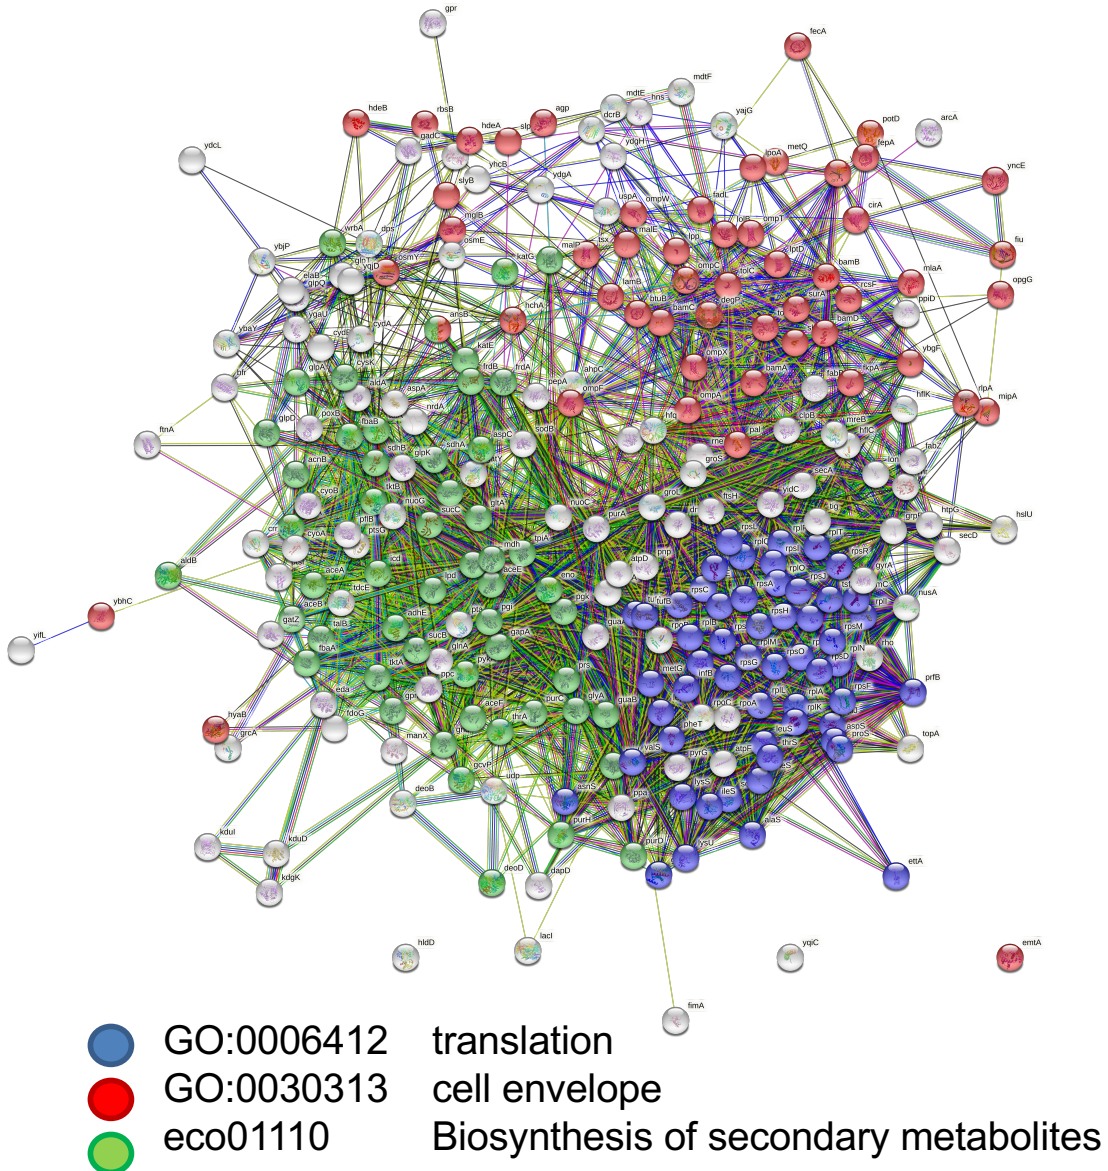

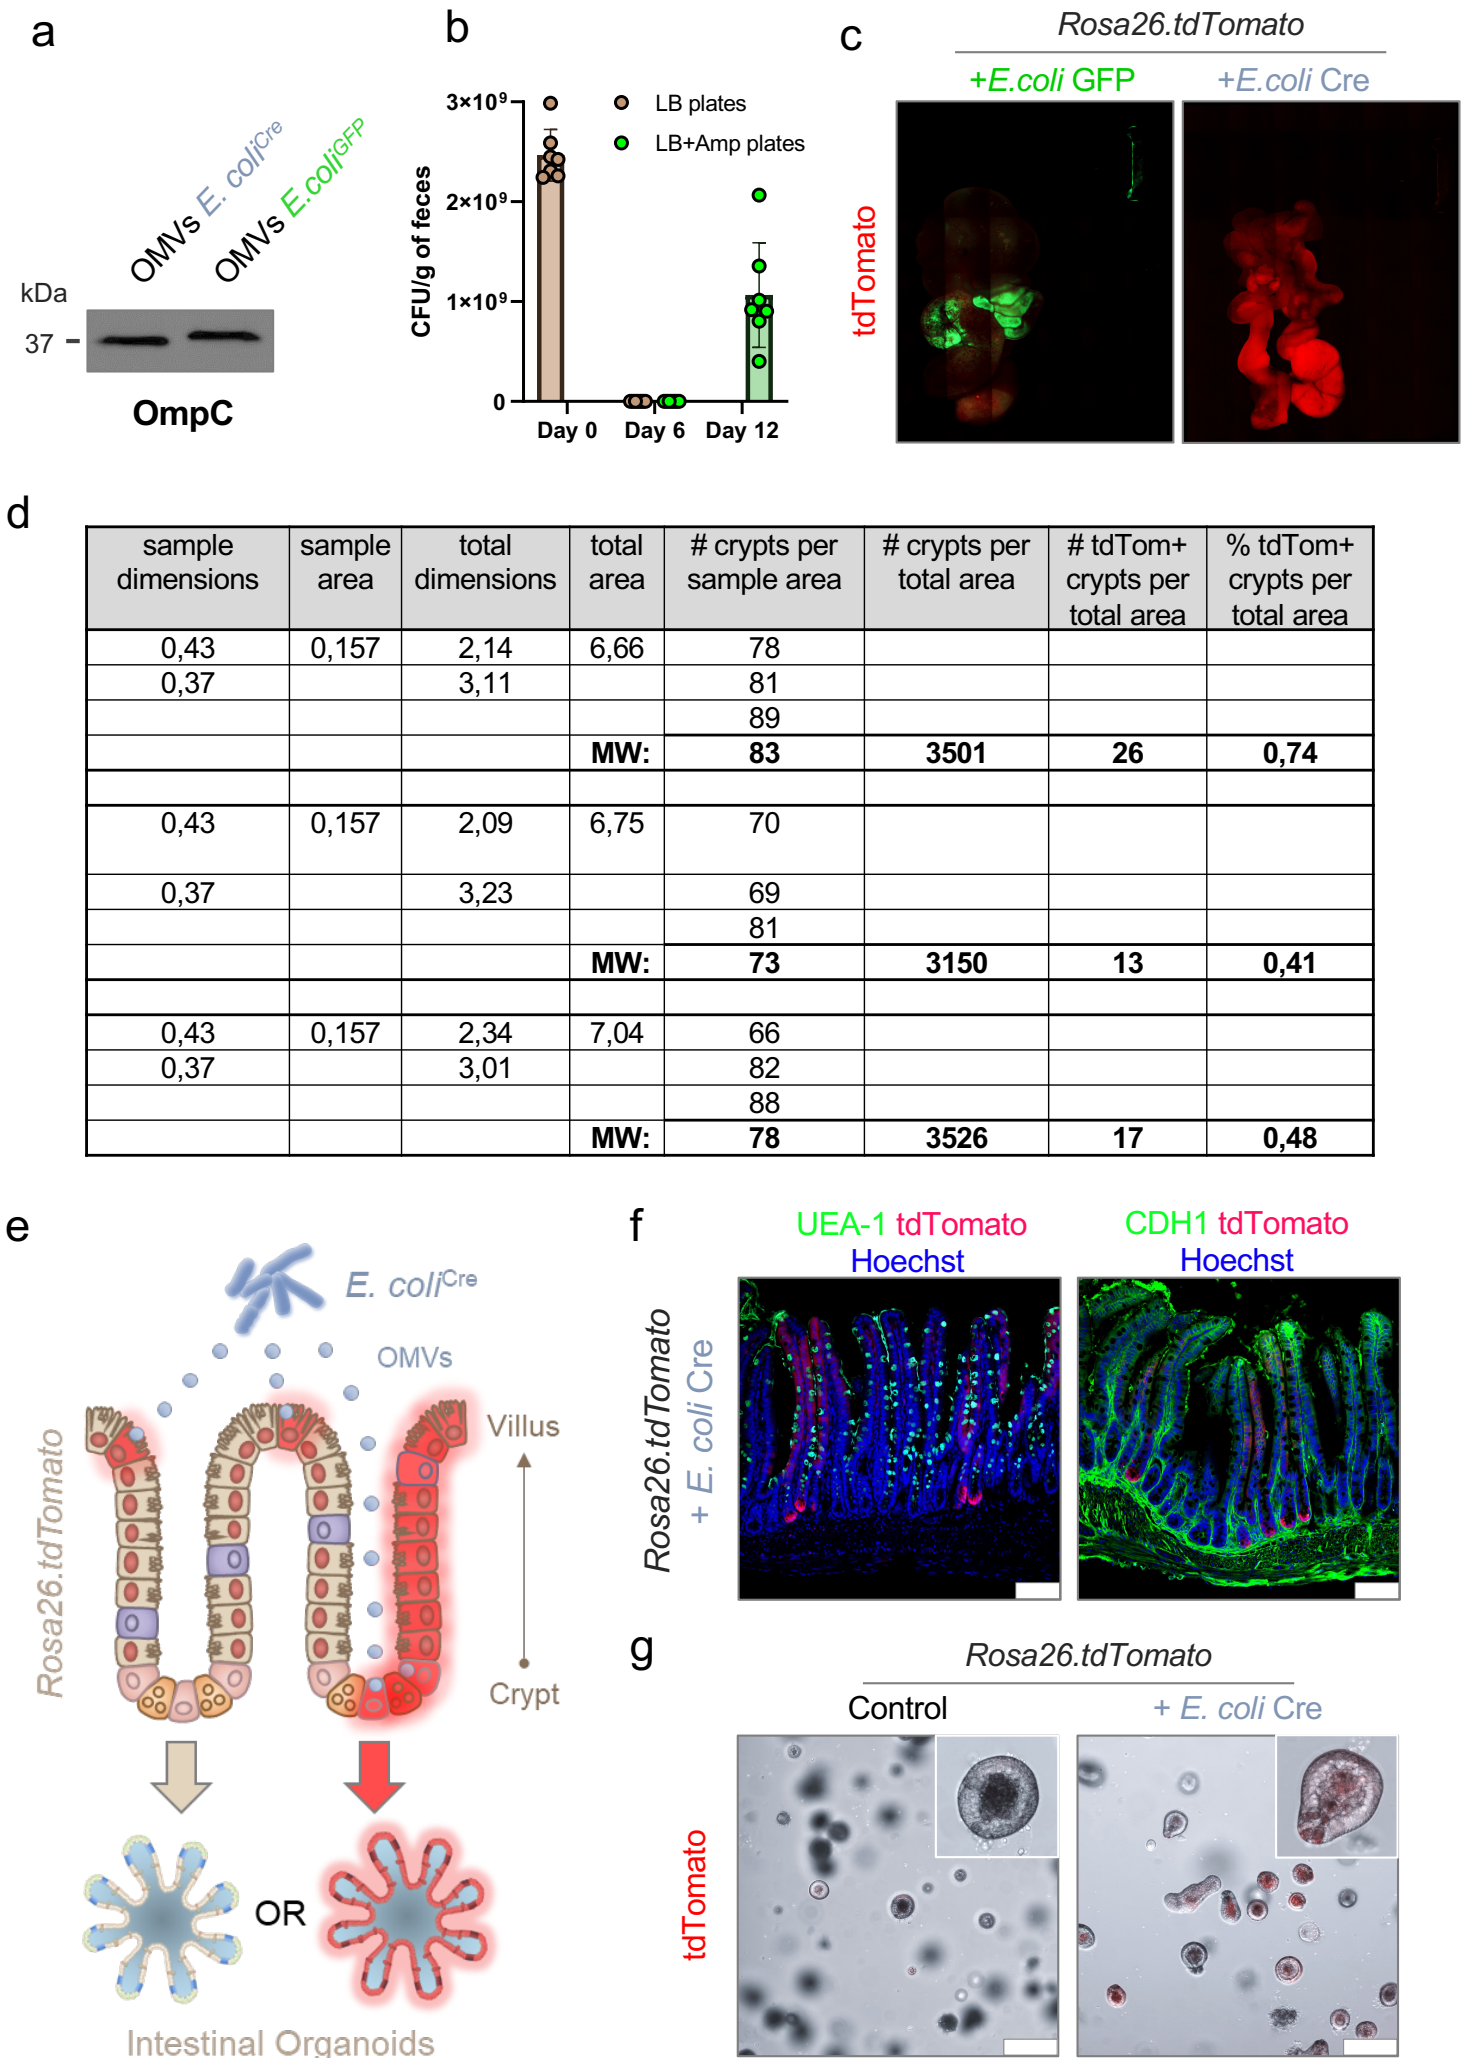



**a**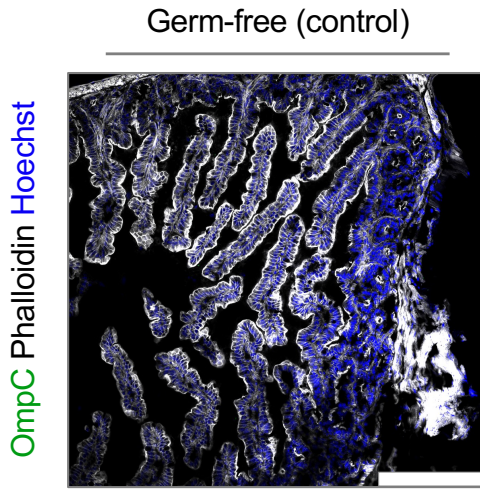**b**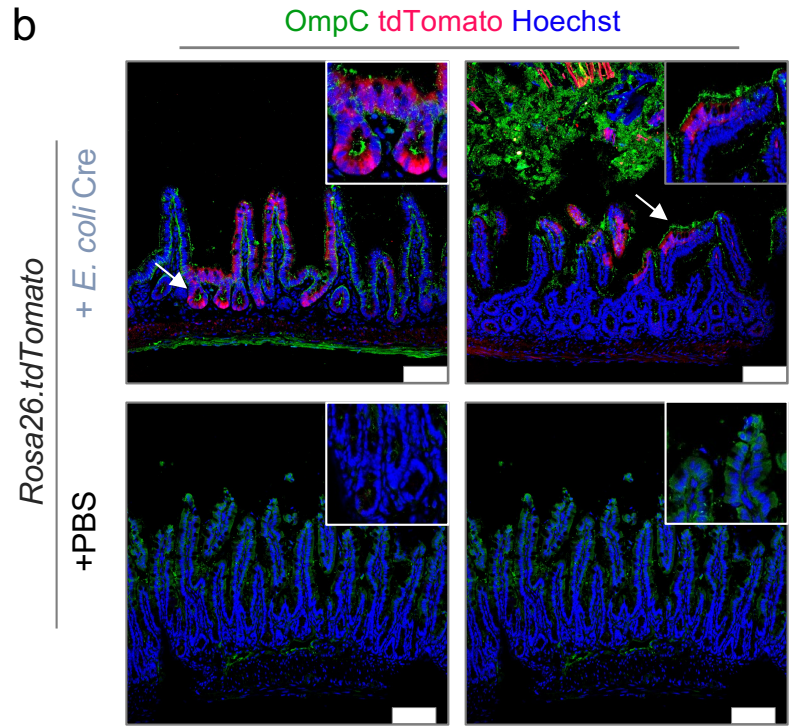**c**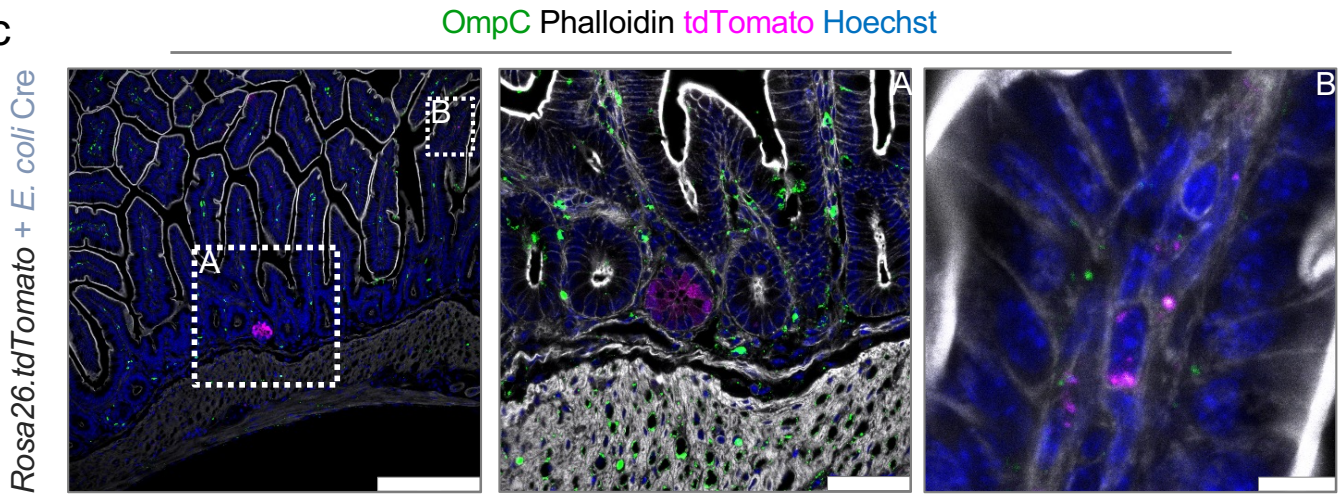**d**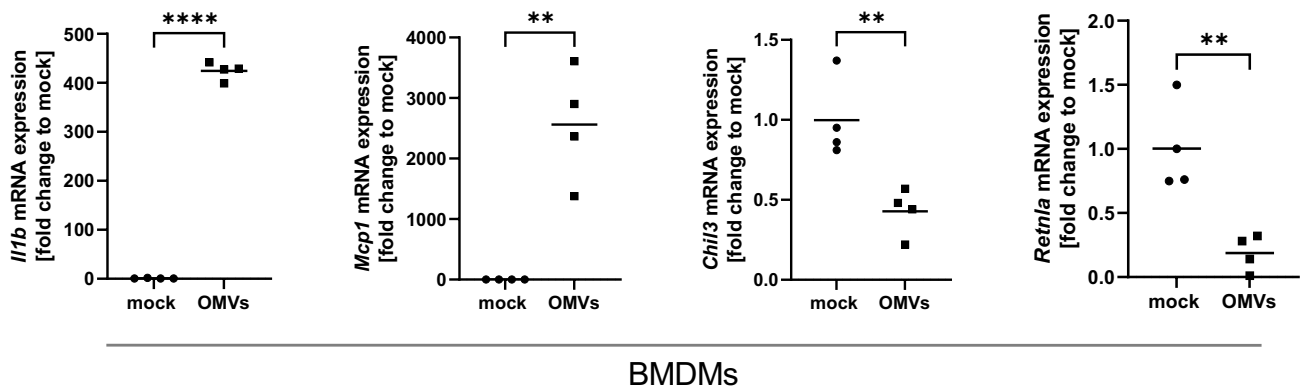

a *Rosa26.tdTomato* + *E. coli* Cre + GFP

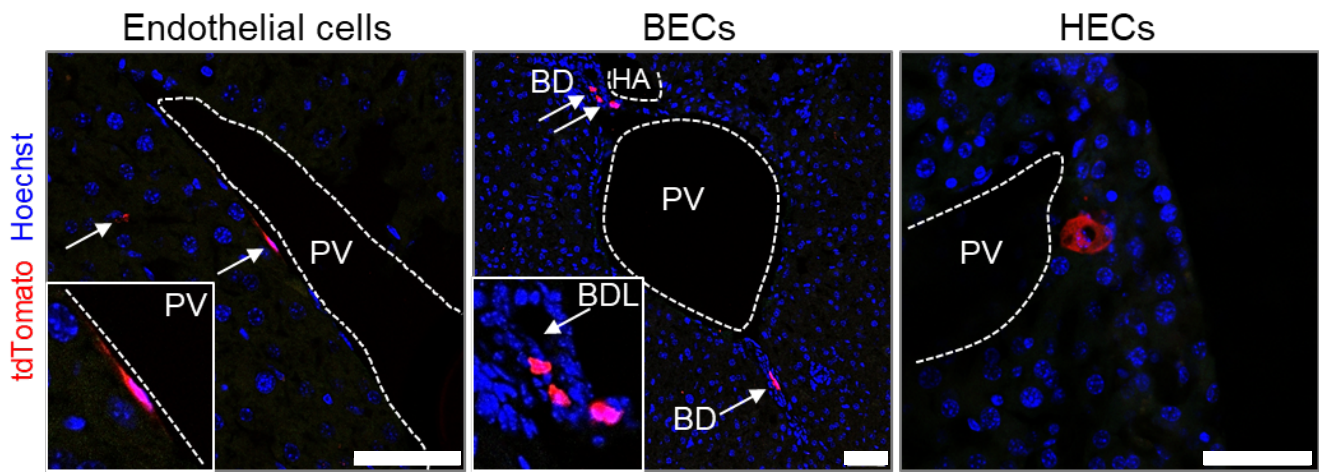

b *Rosa26.tdTomato* + *E. coli* Cre

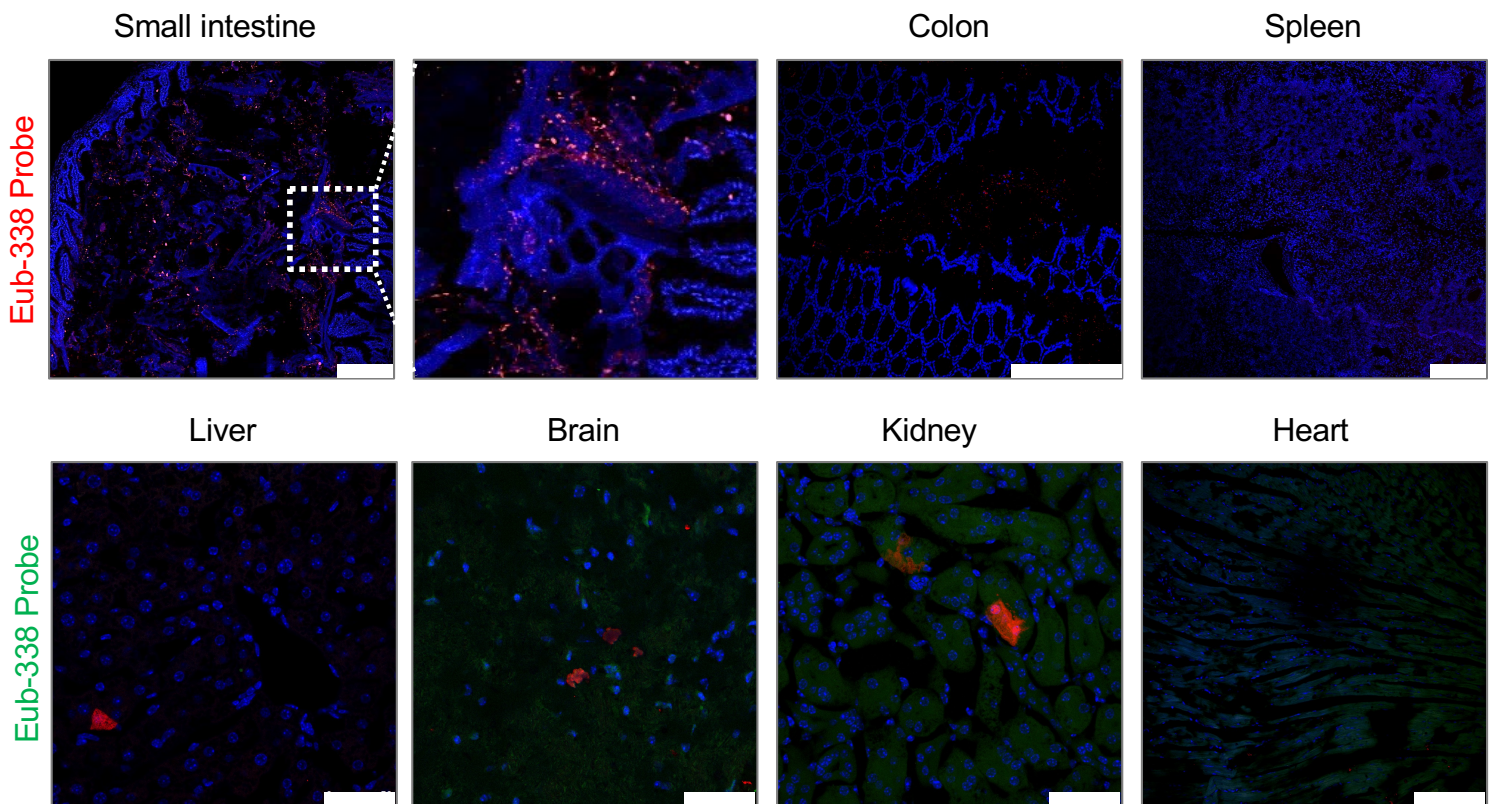



Figure 1b (OmpC)

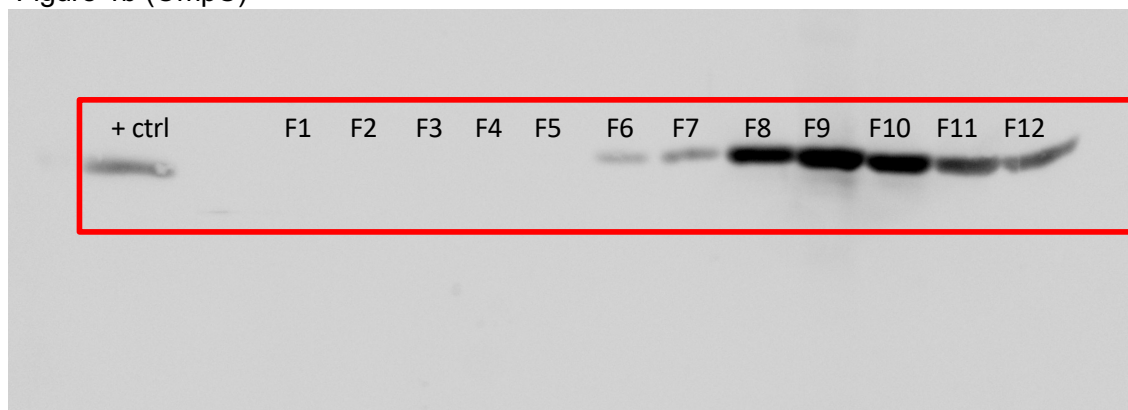

Supplementary Figure 2a (OmpC)

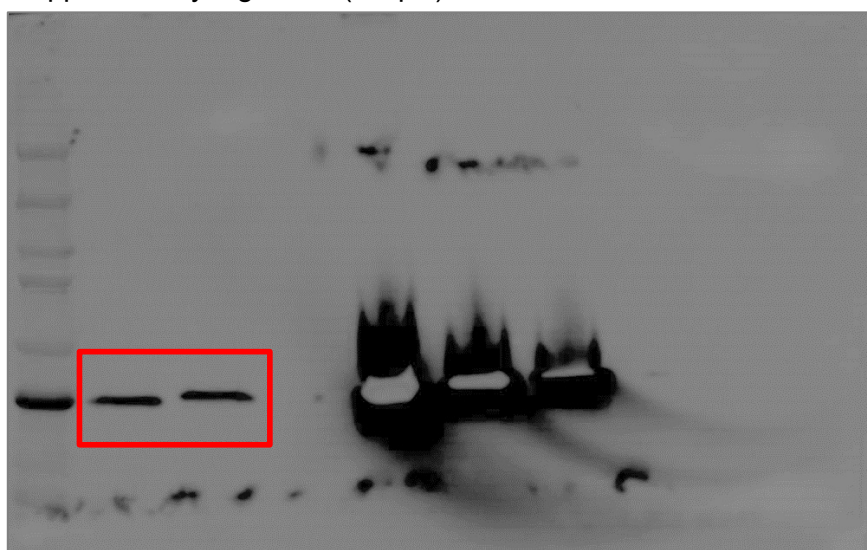

Supplement: JEV2-10-e12159-s002.pdf [file JEV2-10-e12159-s002.pdf]
